# Supplementary figures and images for: A 3D-printed metal column for micro gas chromatography
Source: Royal Society of Chemistry journal article supplement (doi:10.1039/d0lc00540a), 2020-01-01

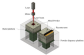

Supplement: d0lc00540a2.pdf [file d0lc00540a2.pdf]

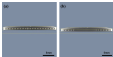

Supplement: d0lc00540a4.pdf [file d0lc00540a4.pdf]

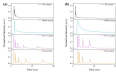

Supplement: d0lc00540a5.pdf [file d0lc00540a5.pdf]

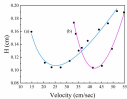

Supplement: d0lc00540a6.pdf [file d0lc00540a6.pdf]

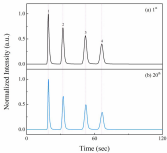

Supplement: d0lc00540a7.pdf [file d0lc00540a7.pdf]
